# Supplementary material for: Patient Suggestions to Improve Emergency Physician Empathy and Communication
Source: PubMed Central journal article supplement — J Patient Exp. 2021 Feb 25;8:2374373521996981. doi: 10.1177/2374373521996981 (PMC8205328; doi:10.1177/2374373521996981), 2021-02-25
Supplement: sj-pdf-1-jpx-10.1177_2374373521996981.pdf [file sj-pdf-1-jpx-10.1177_2374373521996981.pdf]

# CARE Patient Feedback Measure for

Please write today's date here:

|   |   |   |   |   |   |   |   |
|---|---|---|---|---|---|---|---|
|   |   | / |   |   | / |   |   |
| D | D |   | M | M |   | Y | Y |

Please rate the following statements about today's consultation.

Please mark the box like this  with a ball point pen. If you change your mind just cross out your old response and make your new choice. Please answer every statement.

| How good was the practitioner at...                                                                                                                                             | Poor                     | Fair                     | Good                     | Very Good                | Excellent                | Does not apply           |
|---------------------------------------------------------------------------------------------------------------------------------------------------------------------------------|--------------------------|--------------------------|--------------------------|--------------------------|--------------------------|--------------------------|
| <b>1) Making you feel at ease</b><br>(introducing him/herself, explaining his/her position, being friendly and warm towards you, treating you with respect; not cold or abrupt) | <input type="checkbox"/> |
| <b>2) Letting you tell your "story"</b><br>(giving you time to fully describe your condition in your own words; not interrupting, rushing or diverting you)                     | <input type="checkbox"/> |
| <b>3) Really listening</b><br>(paying close attention to what you were saying; not looking at the notes or computer as you were talking)                                        | <input type="checkbox"/> |
| <b>4) Being interested in you as a whole person</b><br>(asking/knowing relevant details about your life, your situation; not treating you as "just a number")                   | <input type="checkbox"/> |
| <b>5) Fully understanding your concerns</b><br>(communicating that he/she had accurately understood your concerns and anxieties; not overlooking or dismissing anything)        | <input type="checkbox"/> |
| <b>6) Showing care and compassion</b><br>(seeming genuinely concerned, connecting with you on a human level; not being indifferent or "detached")                               | <input type="checkbox"/> |
| <b>7) Being positive</b><br>(having a positive approach and a positive attitude; being honest but not negative about your problems)                                             | <input type="checkbox"/> |
| <b>8) Explaining things clearly</b><br>(fully answering your questions; explaining clearly, giving you adequate information; not being vague)                                   | <input type="checkbox"/> |
| <b>9) Helping you to take control</b><br>(exploring with you what you can do to improve your health yourself; encouraging rather than "lecturing" you)                          | <input type="checkbox"/> |
| <b>10) Making a plan of action with you</b><br>(discussing the options, involving you in decisions as much as you want to be involved; not ignoring your views)                 | <input type="checkbox"/> |

**Comments:** If you would like to add further comments on this consultation, please do so here.
